# Supplementary material for: Biliverdin Reductase B Is a Plasma Biomarker for Intraplaque Hemorrhage and a Predictor of Ischemic Stroke in Patients with Symptomatic Carotid Atherosclerosis
Source: MDPI journal article supplement (doi:10.3390/biom13060882), 2023-05-24
Supplement: s1 [file s1]

## Supplementary Figures

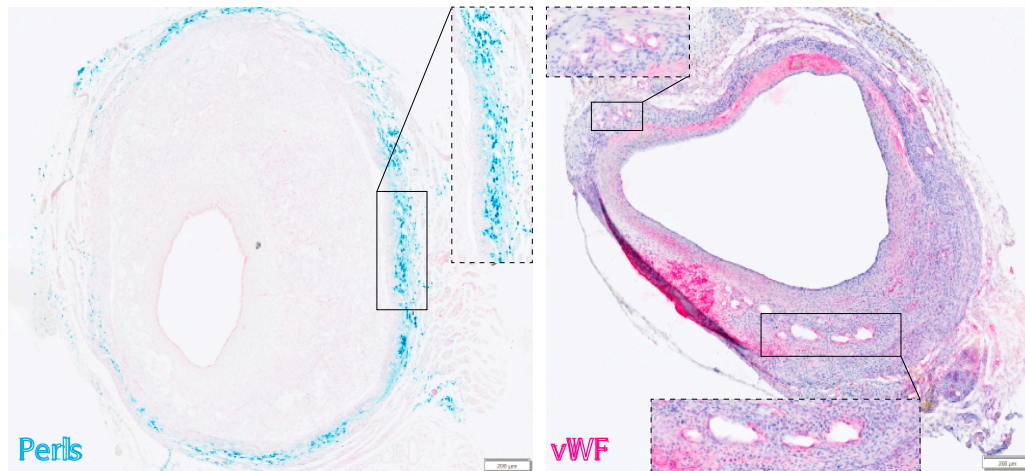

**Supplementary Figure S1: Perl's and vWF staining in a vein graft mouse model in the control mouse.** Perl's staining (blue, left) shows extracellular iron (hemosiderin) deposits from degraded red blood cells. Von Willebrand factor (VWF) (pink, right) stains around neovessels.

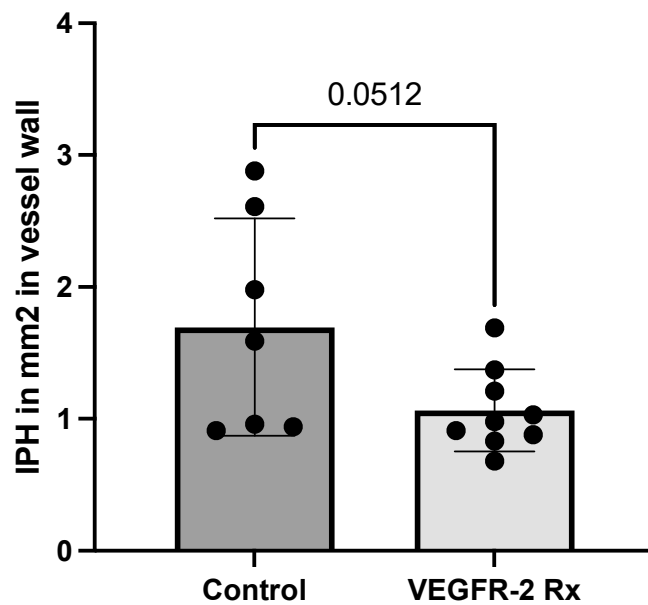

**Supplementary Figure S2: IPH assessment in the vessel wall in the vein graft model.**
